# Supplementary material for: CVAPPS: A Cross-Sectional Study of SARS-CoV-2 Vaccine Acceptance, Perceptions, and Post-Vaccination Side Effects among Rheumatic Disease Patients in Kuwait
Source: MDPI journal article supplement (doi:10.3390/vaccines11030666), 2023-03-15

عزيري المريض

نتمنى أن تصلك تلك الرسالة وأنت في أفضل حال.  
انطلاقاً من رؤية ومنظور المسؤولية الصحية للرابطة الكويتية لأطباء الروماتيزم، فإننا نقدم إليكم هذا الاستبيان الذي يُلقي الضوء على تلقي لقاح كوفيد-19، والذي نهدف من خلاله إلى ما يلي:

- ✓ تقدير الأعداد النسبية للمرضى الذين تلقوا لقاح كوفيد-19 من بين المرضى الذين يعانون من الأمراض الروماتيزمية.
- ✓ دراسة الأعراض قصيرة الأجل التي تلت تلقي اللقاح، وما إذا كان قد حدث أي احتدام للمرض الروماتيزمي.
- ✓ تسليط الضوء على الأسباب الحقيقية وراء امتناع الأشخاص عن تلقي اللقاح (الأسباب الأكثر شيوعاً لامتناع عن تلقي اللقاح).

نتمنى للجميع السلامة، ونشكركم على مشاركتكم في ملء هذا الاستبيان.

معاً سنقضي على الجائحة.

مع خالص التحية،  
الرابطة الكويتية لأطباء الروماتيزم

تعد هذه الوثيقة العربية للنص الهدف ترجمة دقيقة للوثيقة الإنجليزية للنص المصدر، حررت في 13 يونيو 2021 بواسطة شركة فارما- ميد للترجمة

الطبعة المعتمدة، ج.م.ع. ، بريد إلكتروني: [orders@pharmamed-eg.com](mailto:orders@pharmamed-eg.com)  
جميع الحقوق محفوظة.

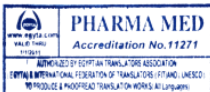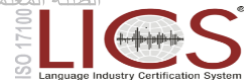

## أهلية المشاركة في الاستبيان الخاص بتلقي لقاح كوفيد-19

كيف علمت بهذا الاستبيان؟

- ☐ طبيب الروماتيزم
- ☐ الممرضة في غرفة التسريب
- ☐ وسائل التواصل الاجتماعي
- ☐ شركة أدوية
- ☐ أحد الأصدقاء/الأقرباء
- ☐ طرق أخرى

أهلية المشاركة في الاستبيان الخاص بتلقي لقاح كوفيد-19:

- ☐ أن تكون مُشخصًا بأنك تعاني من مرض روماتيزمي
- ☐ أن تكون بالغًا من العمر 21 عامًا أو أكثر.

ملحوظة: أنت مؤهل لاستكمال الاستبيان سواء كنت قد تلقيت لقاح كوفيد-19 أم لا.

## الإقرار بالموافقة

من خلال المشاركة، فأنا أؤكد أنني أبلغ من العمر 21 عامًا على الأقل وأوافق على استخدام المعلومات التي أقدمها في التحليل الذي تقوم به الرابطة الكويتية لأطباء الروماتيزم. وأفهم أن بياناتي ستكون مجهولة الهوية، ولن يكون من الممكن تحديد هويتي الشخصية من خلال الإجابات التي سأقدمها اليوم. وأوافق للرابطة الكويتية لأطباء الروماتيزم على مشاركة بيانات الاستبيان (بدون الإفصاح عن هويتي) لأغراض تتعلق بالتنوع المجتمعية والتعليم والأبحاث العلمية.

☐ تأكيد

☐ الخروج من الاستبيان

تخطي إلى: إنهاء الاستبيان إذا اختار المشارك "الخروج من الاستبيان"

## 1. الخصائص الديموجرافية

1.1. في أي عام وُلدت؟

تخطّ إلى: إنهاء الاستبيان إذا كان الشرط: في أي عام وُلدت؟ أكبر من أو يساوي 2004، تخطّ إلى: إنهاء الاستبيان.

1.2. ما نوعك؟

☐ أنثى

☐ ذكر

1.3. ما جنسيتك؟

قائمة منسدلة بها كل الدول

1.4. في أي دولة تعيش؟

قائمة منسدلة بها كل الدول

1.5. من طبيب الروماتيزم المتابع لحالتك؟

1.6. ما مستواك التعليمي؟

☐ شهادة التعليم الابتدائي

☐ شهادة التعليم المتوسط

☐ شهادة التعليم العالي

☐ شهادة مدرسة عليا مهنية

☐ درجة البكالوريوس

☐ درجة الماجستير

☐ درجة الدكتوراه

☐ أخرى (.....)

1.7. هل أنت مقدم رعاية صحية؟

☐ نعم

☐ لا

تعد هذه الوثيقة العربية للنص الهدف ترجمة دقيقة للوثيقة الإنجليزية للنص المصدر، حررت في 13 يونيو 2021 بواسطة شركة فارما- ميد للترجمة

الطبعة المعتمدة، ج.م.ع. ، بريد إلكتروني: [orders@pharmamed-eg.com](mailto:orders@pharmamed-eg.com) جميع الحقوق محفوظة.

1.8. ما وضعك المهني أو الوظيفي؟

- ☐ موظف/أعمل
- ☐ لست موظفًا/لا أعمل
- ☐ متقاعد
- ☐ طالب
- ☐ غير ذلك (يُرجى التحديد)

1.9. ما حالتك الاجتماعية؟

- ☐ أعزب
- ☐ متزوج
- ☐ مطلق/أرمل

تعد هذه الوثيقة العربية للنص الهدف ترجمة دقيقة للوثيقة الإنجليزية للنص المصدر، حررت في 13 يونيو 2021 بواسطة شركة فارما- ميد للترجمة

الطبعة المعتمدة، ج.م.ع. ، بريد إلكتروني: [orders@pharmamed-eg.com](mailto:orders@pharmamed-eg.com)  
جميع الحقوق محفوظة.

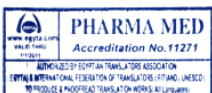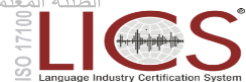

## 2. الوضع الطبي

2.1. هل تدخن؟

- ☐ نعم - أأدخن حاليًا
- ☐ لا - كنت أأدخن؛ ولكنني أقلت عن التدخين
- ☐ لا - لم أأدخن أبدًا

2.2. ما المرض الذي شُخصت بأنك مصاب به مما يلي؟ [اختر خيارًا واحدًا]

- ☐ التهاب المفاصل الروماتويدي.
- ☐ الذئبة الجهازية
- ☐ التصلب الجهازي
- ☐ التهاب الفقار اللاصق
- ☐ التهاب المفاصل الصدفي
- ☐ التهاب الأوعية الدموية
- ☐ التهاب الجلد العضلي/التهاب العضلات المتعدد
- ☐ داء بهجت
- ☐ مرض النقرس/النقرس الكاذب
- ☐ متلازمة شوغرن
- ☐ التهاب المفاصل التفاعلي
- ☐ التهاب المفاصل المصاحب لداء الأمعاء الالتهابي
- ☐ مرض الأنسجة الضامة
- ☐ التهاب المفاصل لدى الصغار
- ☐ الألم العضلي الليفي
- ☐ التهاب المفاصل غير المتميز
- ☐ داء ستيل (مرض التهابي)
- ☐ لم أشخص بأي مصاب بمرض روماتيزمي
- ☐ غير متأكد
- غير ذلك [يرجى التحديد] .....

تخطِ إلى: إنهاء الاستبيان إذا تم تشخيصك بأي مما يلي؟ = لم أشخص بأي مصاب بمرض روماتيزمي

تعد هذه الوثيقة العربية للنص الهدف ترجمة دقيقة للوثيقة الإنجليزية للنص المصدر، حررت في 13 يونيو 2021 بواسطة شركة فارما- ميد للترجمة

الطبعة المعتمدة، ج.م.ع. ، بريد إلكتروني: [orders@pharmamed-eg.com](mailto:orders@pharmamed-eg.com)  
جميع الحقوق محفوظة.

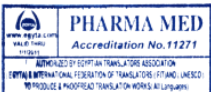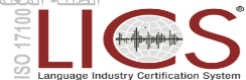

2.3. في أي عام تقريبًا شُخصت بأنك مصاب بحالة من مرض روماتيزمي؟  
على سبيل المثال: 1996

2.4. أي أدوية مما يلي كنت تتناولها في الأشهر الثلاثة الماضية لعلاج المرض الروماتيزمي؟ [اختر كل ما ينطبق]

- ☐ أباتاسيب (أورنيسيا)
- ☐ أداليموماب (هوميرا)
- ☐ أبريميلاست (أوتيزلا)
- ☐ أزاثيوبرين (إميوران)
- ☐ باريسيتينيب (الوميانت)
- ☐ بيليموماب (بنليستا)
- ☐ سيرتيزولوماب (سيمزيا)
- ☐ كلوروكين (دافوكين)
- ☐ الكورتيكوستيرويدات
- ☐ سيكلوفوسفاميد
- ☐ إيتانيرسيبت (انبريل)
- ☐ جوليموماب (سيمبوني)
- ☐ هيدروكسي كلوروكين (بلاكونيل)
- ☐ إنفليكسيماب (ريميكيد)
- ☐ لفلونوميد (ارافا)
- ☐ ميثوتريكسات
- ☐ ميكوفينولات موفيتيل (سيلسبت/مايفورتيك)
- ☐ ريتوكسيماب (مابثيرا)
- ☐ سيكوكينوماب (كوزنتكس)
- ☐ سالفاسالازين (سالازوبيرين)
- ☐ تاكروليموس (بروجراف)
- ☐ توسيليزوماب (أكتيمرا)
- ☐ توفاسيتينيب (زيلجانز)
- ☐ أوستيكنوماب (ستيلارا)
- ☐ لا أتناول أي أدوية
- ☐ غير متأكد
- ☐ غير ذلك [يُرجى التحديد] .....

2.5. ما أفضل وصف يمكن أن تصف به مرضك الروماتيزمي في الثلاثة أشهر السابقة؟

- ☐ غير نشط
- ☐ نشط بدرجة بسيطة إلى معتدلة
- ☐ نشط بدرجة شديدة

2.6. هل تعاني من أي أمراض مزمنة أخرى؟

- ☐ مرض السُّكَّري.
- ☐ مرض بالقلب
- ☐ ارتفاع ضغط الدم
- ☐ مرض بالرئة
- ☐ السمنة
- ☐ مرض بالكلَى
- ☐ السرطان
- ☐ نقص المناعة، بما في ذلك فيروس نقص المناعة البشرية
- ☐ لا يوجد
- ☐ غير ذلك [يُرجى التحديد]

تعد هذه الوثيقة العربية للنص الهدف ترجمة دقيقة للوثيقة الإنجليزية للنص المصدر، حررت في 13 يونيو 2021 بواسطة شركة فارما- ميد للترجمة

الطبية المعتمدة، ج.م.ع. ، بريد إلكتروني: [orders@pharmamed-eg.com](mailto:orders@pharmamed-eg.com)  
جميع الحقوق محفوظة.

### 3. الوضع المتعلق بمرض كوفيد-19

3.1. هل أجريت مسحة طبية وكانت النتيجة إيجابية وتؤكد أنك مصاب بمرض كوفيد-19؟

☐ نعم

☐ لا

إذا كانت الإجابة "لا"

3.1.1. هل خضعت للحجر الصحي خلال الفترة من 2019 إلى 2021؟

☐ نعم

☐ لا

إذا كانت الإجابة "نعم"

3.1.1.1. ماذا كان السبب؟

☐ السفر

☐ مخالطة شخص مصاب بالفيروس

3.1.2. إلى أي مدى تقلق من التعرض للإصابة بمرض كوفيد-19؟

☐ لا أقلق

☐ أقلق بدرجة بسيطة

☐ أقلق بدرجة متوسطة

☐ أقلق بدرجة شديدة

☐ أقلق بدرجة شديدة للغاية

3.1.3. إلى أي مدى تقلق من الإصابة بعدوى كوفيد-19 بدرجة شديدة؟

☐ لا أقلق

☐ أقلق بدرجة بسيطة

☐ أقلق بدرجة متوسطة

☐ أقلق بدرجة شديدة

☐ أقلق بدرجة شديدة للغاية

إذا كانت الإجابة "نعم"

3.2.1. في أي تاريخ كانت نتائج التشخيص إيجابية؟ [أدخل التقويم هنا]

3.2.2. كيف سارت الأمور؟ [اختر خيارًا واحدًا]

☐ لم أودع بالمستشفى

☐ أودعت بالمستشفى ولكني لم أوضع على جهاز الأكسجين

☐ أودعت بالمستشفى ووضعت على جهاز الأكسجين

☐ أودعت بالمستشفى بقسم العناية المركزة



3.3. منذ أن بدأت الجائحة، هل تعرض أي شخص من المحيطين بك (من الأصدقاء أو الزملاء أو الأقرباء) للإصابة بعدوى كوفيد بدرجة شديدة (استلزمت إيداعه بالمستشفى أو دخوله إلى قسم العناية المركزة أو أدت إلى وفاته)؟

☐ نعم

☐ لا

## 4. الوضع المتعلق باللقاح

4.1. هل تعاني من حساسية تجاه أي لقاح؟

- ☐ نعم  
☐ لا  
☐ غير متأكد/لا أتذكر

4.2. هل رفضت من قبل أن تتلقى لقاحًا موصى به أو تعطيه لأحد أطفالك؟

- ☐ نعم  
☐ لا  
☐ غير متأكد/لا أتذكر

4.3. هل تلقيت لقاح الإنفلونزا (الوقاية من نزلات البرد) في عام 2019؟

- ☐ نعم  
☐ لا  
☐ غير متأكد/لا أتذكر

4.4. هل تلقيت لقاح الإنفلونزا (الوقاية من نزلات البرد) في عام 2020؟

- ☐ نعم  
☐ لا  
☐ غير متأكد/لا أتذكر

4.5. هل تلقيت لقاح المكورات الرئوية؟

- ☐ نعم  
☐ لا  
☐ غير متأكد/لا أتذكر

تعد هذه الوثيقة العربية للنص الهدف ترجمة دقيقة للوثيقة الإنجليزية للنص المصدر، حررت في 13 يونيو 2021 بواسطة شركة فارما- ميد للترجمة

الطبعة المعتمدة، ج.م.ع. ، بريد إلكتروني: [orders@pharmamed-eg.com](mailto:orders@pharmamed-eg.com)

جميع الحقوق محفوظة.

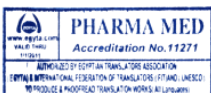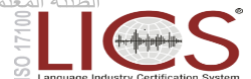

## 5. لقاح كوفيد-19

5.1. هل استشرت طبيبك بخصوص لقاح كوفيد-19؟

- ☐ نعم  
☐ لا  
☐ غير متأكد/لا أتذكر

5.2. هل نصحك الطبيب بعدم تلقي اللقاح؟

- ☐ نعم  
☐ لا  
☐ غير متأكد/لا أتذكر

5.3. هل تطلع صحيفة النصائح عبر الإنترنت التي تقدمها الرابطة الكويتية لأطباء الروماتيزم بخصوص لقاح كوفيد-19؟

- ☐ نعم  
☐ لا  
☐ غير متأكد/لا أتذكر

5.4. ما المصدر الذي تتلقى منه معلوماتك عن اللقاح؟ (اختر كل ما ينطبق)

- ☐ ليست لدي معلومات  
☐ وسائل الأخبار (التلفاز/الراديو/الجرائد)  
☐ وسائل التواصل الاجتماعي  
☐ نصائح الصحة العامة التي تقدمها الحكومة  
☐ الأصدقاء/العائلة  
☐ المنشورات الطبية  
☐ طبيبك (أطباء) أو أخصائيو الرعاية الصحية الآخرون  
☐ المريض أو مؤسسة (مؤسسات) مهنية  
☐ غير ذلك (يرجى التحديد)

5.5 هل تلقيت لقاح كوفيد-19؟

☐ نعم

☐ لا

إذا كانت الإجابة "نعم":

5.5.1. ما كان السبب لتلقيك لقاح كوفيد-19؟

☐ لأنني أخشى الإصابة/الإصابة بدرجة شديدة بعدوى كوفيد-19

☐ لأنني أخشى أن أتوفي متأثراً بإصابتي بكوفيد-19

☐ لأنني أرغب في حماية أسرتي من الإصابة بكوفيد-19

☐ لأن تلقي اللقاح سيقلل الأعباء المالية التي أتكبدها بسبب الجائحة

☐ لأنني أعتقد أن اللقاح هو الوسيلة الوحيدة التي يمكن أن تساعدنا على أن تعود حياتنا لما كانت عليه قبل تفشي كوفيد-19

☐ لأنني أثق في العموم في المعلومات والتعليمات التي تصدر عن الحكومة

5.5.2. ما اللقاح الذي تلقيته؟

☐ فايزر/بيوأنتك

☐ أسترازينيكا/أوكسفورد

☐ مودرنا

☐ جونسون آند جونسون

☐ سبوتنيك V

☐ سينوفاك

☐ غير ذلك (يرجى التحديد)

5.5.3. متى كانت الجرعة الأولى؟

[ أدخل التقويم هنا ]

5.5.4. متى كانت الجرعة الثانية؟

(اتركها فارغة إذا لم تكن قد تلقيتها بعد أو إذا كانت غير قابلة للتطبيق)

[ أدخل التقويم هنا ]

5.5.5. هل توقفت عن تناول أدويةك أو أجريت عليها أي تعديلات؟

☐ نعم

☐ لا

☐ غير متأكد/لا أتذكر

5.5.6. إذا كانت الإجابة "نعم"، فيرجى التحديد [.....]

تعد هذه الوثيقة العربية للنص الهدف ترجمة دقيقة للوثيقة الإنجليزية للنص المصدر، حررت في 13 يونيو 2021 بواسطة شركة فارما- ميد للترجمة

الطبعة المعتمدة، ج.م.ع. ، بريد إلكتروني: [orders@pharmamed-eg.com](mailto:orders@pharmamed-eg.com)

جميع الحقوق محفوظة.

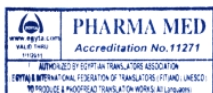

5.5.6. هل تعرضت لأي آثار جانبية بعدما تلقيت لقاح كوفيد- 19 الخاص بك؟

- ☐ التآق
- ☐ جلطات دموية
- ☐ اضطرابات بضغط الدم
- ☐ اضطرابات بمستوى السكر في الدم
- ☐ ألم/وجع بالجسم
- ☐ طفح جلدي بالوجه والجسم
- ☐ إرهاب
- ☐ حمى
- ☐ صداع
- ☐ تورم المفاصل
- ☐ كدمات/طفح جلدي موضعي في موضع الحقن
- ☐ غثيان/قيء
- ☐ أعراض عصبية
- ☐ ألم في موضع الحقن
- ☐ صعوبة في التنفس
- ☐ احتدام تفاقم المرض الروماتيزمي (تطلب الذهاب إلى الطبيب)
- ☐ تورم العقد الليمفاوية
- ☐ لا يوجد
- ☐ غير ذلك (يرجى التحديد)

5.5.7. كم من الوقت استمرت الآثار الجانبية؟

- ☐ من 1 إلى 5 أيام
- ☐ من 5 إلى 10 أيام
- ☐ من 10 إلى 14 يوماً
- ☐ أكثر من 14 يوماً

5.5.8. هل تعتقد أن تلقي لقاح كوفيد-19 يجب أن يكون إلزامياً؟

- ☐ نعم
- ☐ لا

تعد هذه الوثيقة العربية للنص الهدف ترجمة دقيقة للوثيقة الإنجليزية للنص المصدر، حررت في 13 يونيو 2021 بواسطة شركة فارما- ميد للترجمة

الطبعة المعتمدة، ج.م.ع. ، بريد إلكتروني: [orders@pharmamed-eg.com](mailto:orders@pharmamed-eg.com)

جميع الحقوق محفوظة.

إذا كانت الإجابة "لا".

5.5.9. لم تتلقَ لقاح كوفيد-19 للسبب الآتي:

- ☐ لأنني مازلت أنتظر تلقي اللقاح
- ☐ لأنني أعارض تلقي لقاح كوفيد-19
- ☐ لأنني طلبت تحديد موعد؛ ولكن وزارة الصحة رفضته (بسبب معاناتي من التأق أو لأنني حامل أو لأنني أصبت بكوفيد-19 في آخر 90 يومًا أو لأنني أصغر من 16 عامًا أو لأنني أعاني من عدوى نشطة)

تخطِ إلى "القسم 6" إذا لم تتلقَ لقاح كوفيد-19 للسبب الآتي = لأنني أعارض حملة تلقي لقاح كوفيد-19

تعد هذه الوثيقة العربية للنص الهدف ترجمة دقيقة للوثيقة الإنجليزية للنص المصدر، حررت في 13 يونيو 2021 بواسطة شركة فارما- ميد للترجمة

الطبية المعتمدة، ج.م.ع. ، بريد إلكتروني: [orders@pharmamed-eg.com](mailto:orders@pharmamed-eg.com)

جميع الحقوق محفوظة.

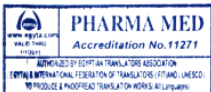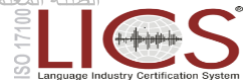

## 6. معارضة تلقي اللقاح

فقط للمشاركين الذين كانت إجابتهم عن السؤال "لم تتلقَ لقاح كوفيد-19 للسبب الآتي" =  
لأنني أعارض حملة تلقي لقاح كوفيد-19

6.1. ما أفضل عبارة تصفك مما يلي؟

- ☐ أعارض تلقي اللقاح بشكل عام
- ☐ أعارض تلقي لقاح كوفيد-19 لأنني غير متأكد من فعاليته
- ☐ أعارض تلقي لقاح كوفيد-19 لأنني قلق من آثاره الجانبية
- ☐ أعارض تلقي لقاح كوفيد-19 لعدم توفر بيانات كافية، ولأنه قد تم استبعاد المرضى المصابين بمرض روماتيزمي من الدراسات
- ☐ أعتقد أنني قد أصاب بعدوى كوفيد-19 بعد تلقي اللقاح
- ☐ أعارض تلقي لقاح كوفيد-19 لأنني أخشى أن يفاقم مرضي أو يتعارض مع علاجي
- ☐ أعارض تلقي لقاح كوفيد-19 لأنني أعتقد أنه يُوصى به لأسباب اقتصادية بدعم من شركات الأدوية
- ☐ السبب وراء رفضي لتلقي اللقاح هو أنني مصاب برهاب (فوبيا) الحقن
- ☐ السبب وراء رفضي لتلقي اللقاح هو أنني قد عانيت سابقاً من تأق للقاح

6.2. هل سترغب في تلقي اللقاح إذا توفرت بيانات أكثر عن أمان وفعالية اللقاحات المختلفة؟

- ☐ نعم
- ☐ لا
- ☐ لا أعرف

6.3. هل تلقى أي فرد من أفراد أسرته (من الدرجة الأولى) اللقاح؟

- ☐ نعم
- ☐ لا
- ☐ لا أعرف

6.4. هل تنصح أيًا من أفراد أسرته أو أقاربك بألا يتلقوا لقاح كوفيد-19؟

- ☐ نعم
- ☐ لا

6.5. إذا كان تلقي لقاح كوفيد-19 إلزاميًا، فهل ستتلقى اللقاح؟

- ☐ نعم
- ☐ لا
- ☐ لا أعرف

6.6. إذا وُجِّهت إليك دعوة لحضور فعالية لزيادة الوعي بأهمية لقاح كوفيد-19، فهل ستحضر؟

☐ نعم

☐ لا

تعد هذه الوثيقة العربية للنص الهدف ترجمة دقيقة للوثيقة الإنجليزية للنص المصدر، حررت في 13 يونيو 2021 بواسطة شركة فارما- ميد للترجمة

الطبية المعتمدة، ج.م.ع. ، بريد إلكتروني: [orders@pharmamed-eg.com](mailto:orders@pharmamed-eg.com)  
جميع الحقوق محفوظة.

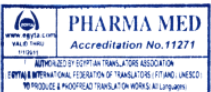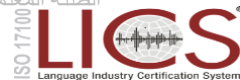

Supplement: s1 [file s1]
